# Supplementary material for: Ononin ameliorates inflammation and cartilage degradation in rat chondrocytes with IL-1β-induced osteoarthritis by downregulating the MAPK and NF-κB pathways
Source: PubMed Central journal article supplement (PMC8793192; doi:10.1186/s12906-022-03504-5), 2022-01-27
Supplement: 12906_2022_3504_MOESM1_ESM.pdf [file 12906_2022_3504_MOESM1_ESM.pdf]

# **Ononin Ameliorates Inflammation and Cartilage Degradation in Rat Chondrocytes with IL-1 $\beta$ -induced Osteoarthritis by downregulating the MAPK and NF- $\kappa$ B Pathways**

Fang Xu<sup>1,2</sup>, Liang-Jun Zhao<sup>3</sup>, Ting Liao<sup>4</sup>, Zhao-Cong Li<sup>2,5</sup>, Lei-Lei Wang<sup>2,5</sup>, Pan-Yu Lin<sup>1</sup>, Rui Jiang<sup>1</sup>, Qing-Jun Wei<sup>1\*</sup>

\* Correspondence: weiqingjungxnn@163.com

<sup>1</sup>Department of Orthopaedics Trauma and Hand Surgery, The First Affiliated Hospital of Guangxi Medical University, Nanning, 530021, China.

<sup>2</sup>Guangxi Colleges and Universities Key Laboratory of Prevention and Control of Highly Prevalent Diseases, Guangxi Medical University, Nanning, 530021, China.

<sup>3</sup>Department of Bone and Joint Surgery, The First Affiliated Hospital of Guangxi Medical University, Nanning, 530021, China.

<sup>4</sup>Department of Endocrinology, Liuzhou Municipal Liutie Central Hospital, Liuzhou, 545007, China.

<sup>5</sup>Department of Toxicology, School of Public Health, Guangxi Medical University, Nanning, 530021, Guangxi, China.

Fang Xu and Liang-Jun Zhao contributed equally to this work.

Full list of author information is available at the end of the article.

**Supplementary Information**

the full length original blot

**Collegan II:**

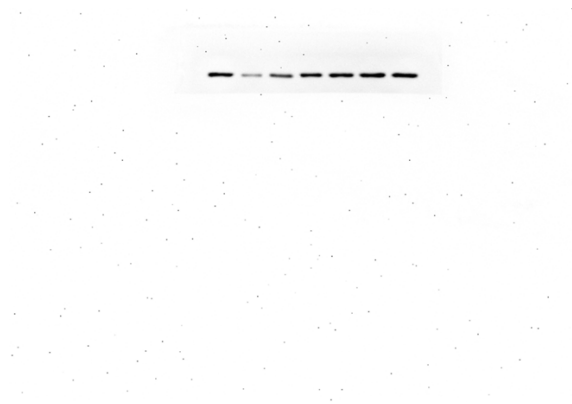

**Figure 1 a. the original blot of collegan II.**

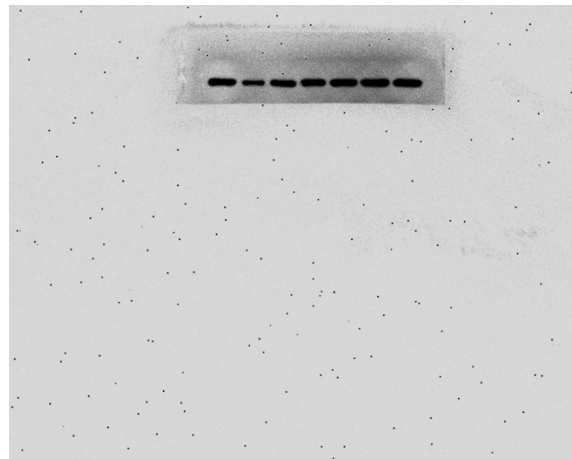

**Figure 1 b. the original blot of collegan II (another exposure image).**

**MMP-13:**

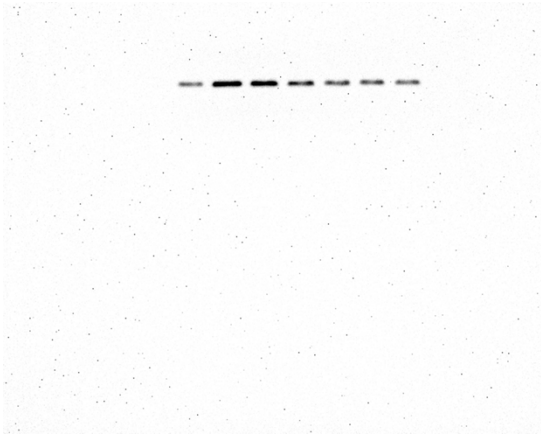

**Figure 2 a. the original blot of MMP-13.**

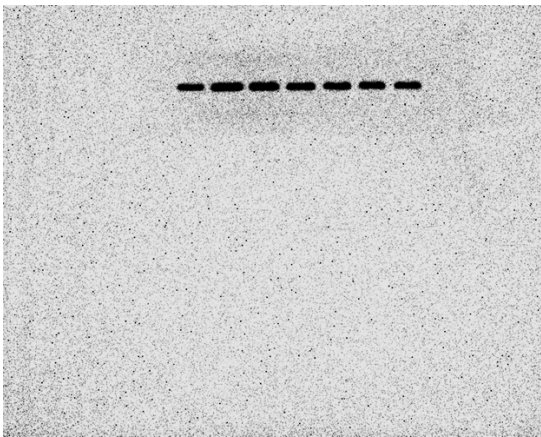

**Figure 2 b. the original blot of MMP-13 (another exposure image).**

**GAPDH (for collegan II and MMP-13 proteins):**

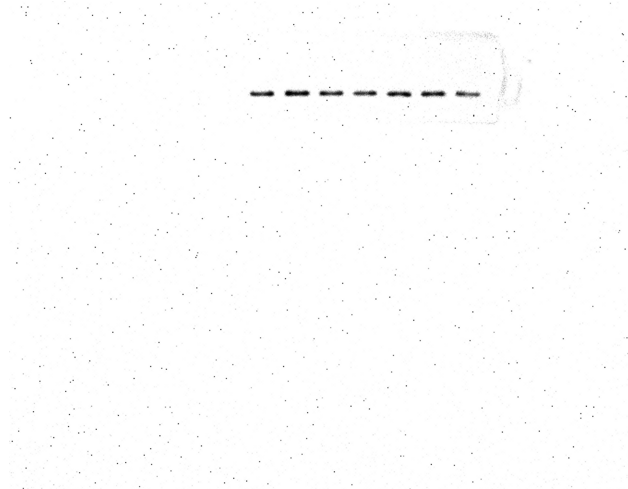

**Figure 3 a. the original blot of GAPDH (for collegan II and MMP-13 proteins).**

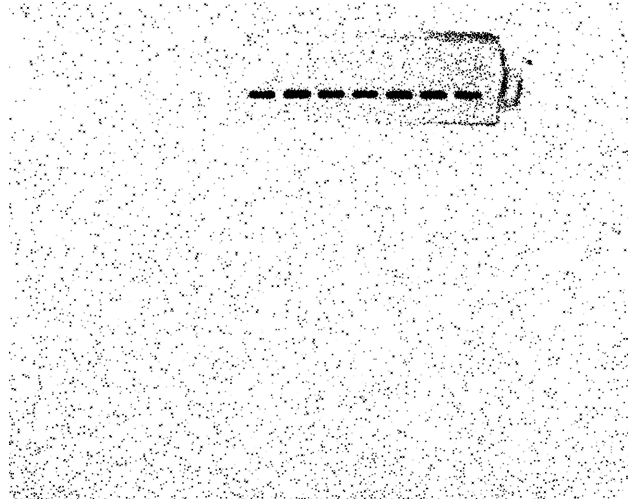

**Figure 3 b. the original blot of GAPDH (for collegan II and MMP-13 proteins) (another exposure image).**

**p-ERK:**

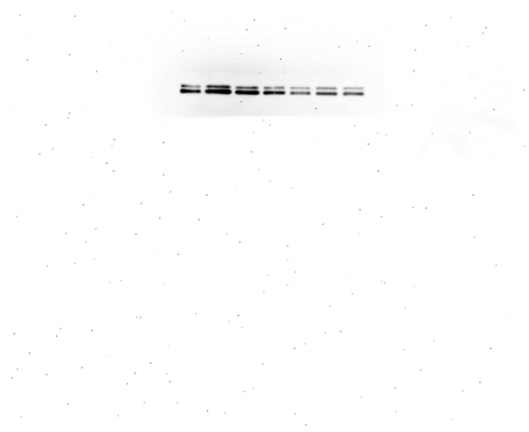

**Figure 4 a. the original blot of p-ERK.**

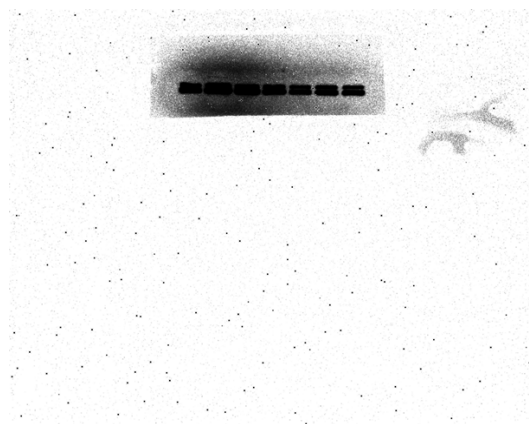

**Figure 4 b. the original blot of p-ERK (another exposure image).**

**t-ERK:**

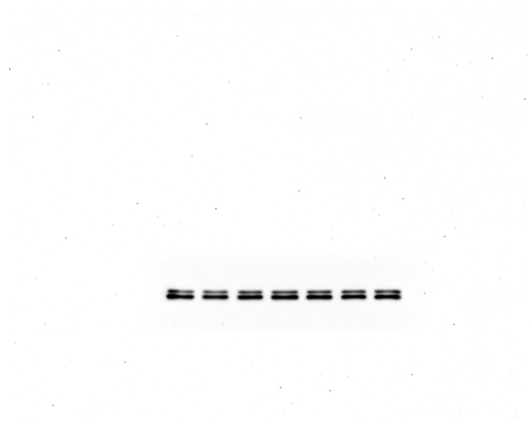

**Figure 5 a. the original blot of t-ERK.**

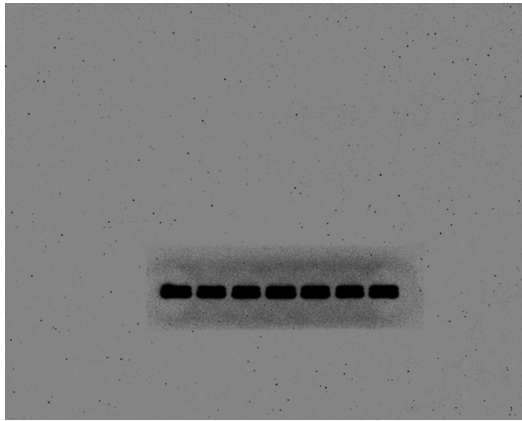

**Figure 5 b. the original blot of t-ERK (another exposure image).**

**p-JNK:**

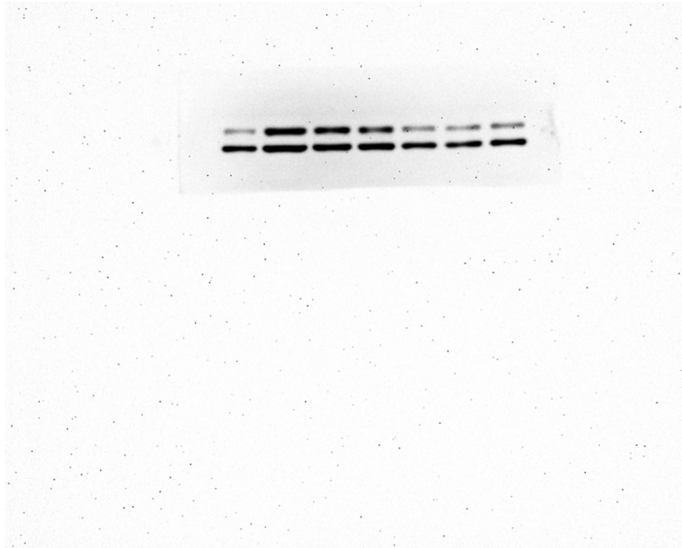

**Figure 6. the original blot of p-JNK.**

**t-JNK:**

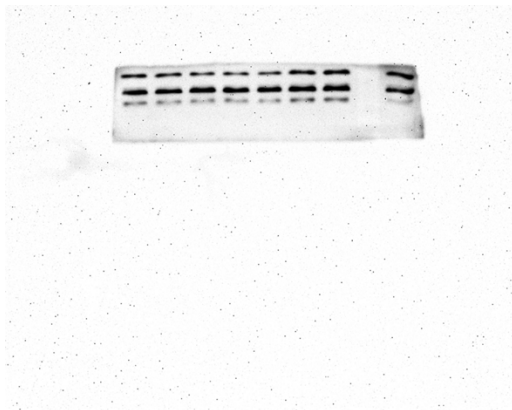

**Figure 7. the original blot of t-JNK.**

**p-P38 (bottommost blot):**

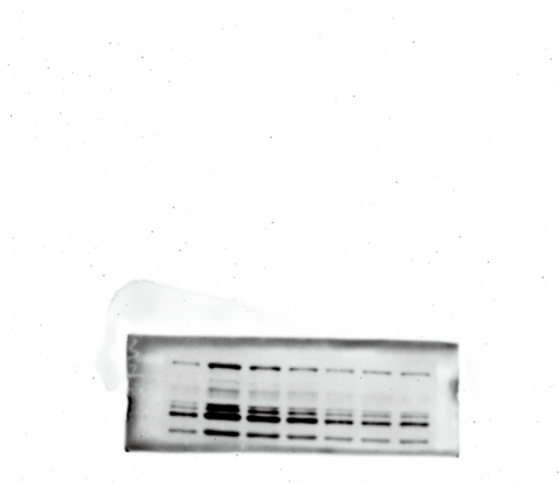

**Figure 8. the original blot of p-P38 (bottommost of the blot).**

**t-P38:**

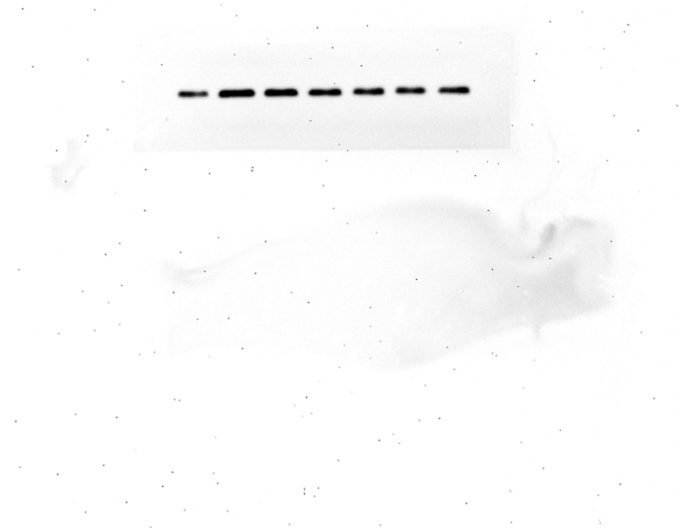

**Figure 9 a. the original blot of t-P38.**

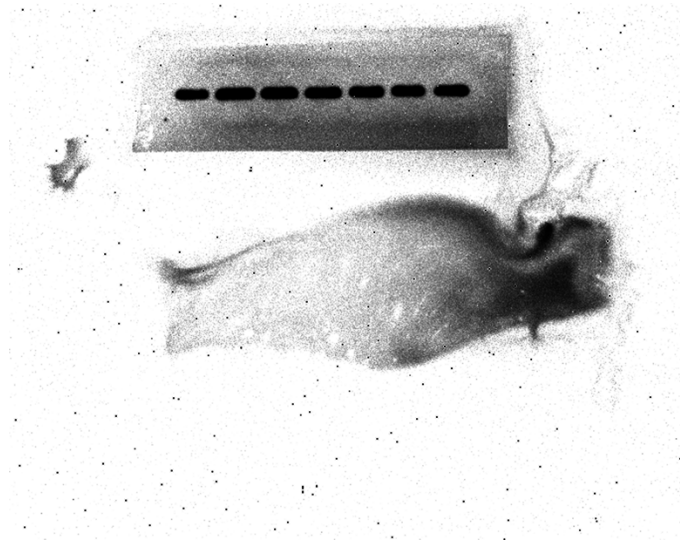

**Figure 9 b. the original blot of t-P38 (another exposure image).**



**p-IzB $\alpha$ :**

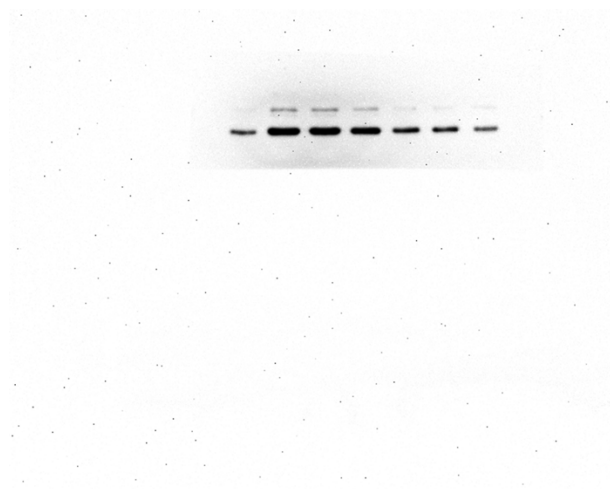

**Figure 10.** the original blot of p-IzB $\alpha$ .

**t-IzB $\alpha$ :**

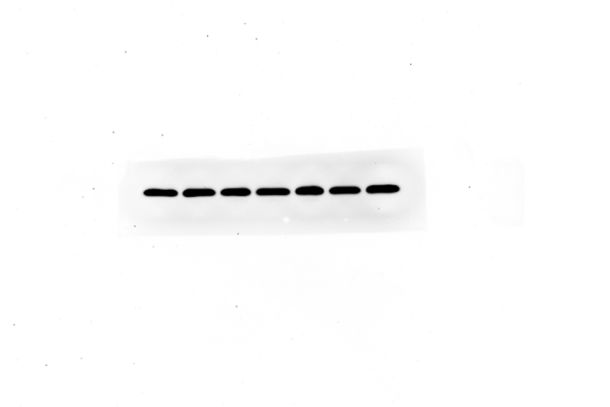

**Figure 11 a.** the original blot of t-IzB $\alpha$ .

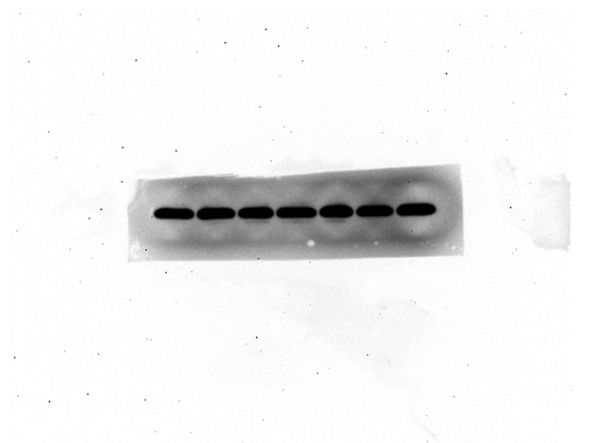

**Figure 11 b.** the original blot of t-IzB $\alpha$  (another exposure image).

**p-P65 (upmost blot):**

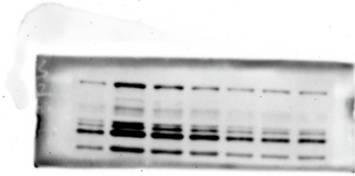

**Figure 12. the original blot of p-P65 (upmost blot).**

**t-P65:**

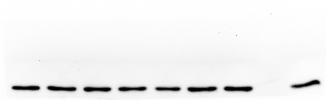

**Figure 13 a. the original blot of t-P65.**

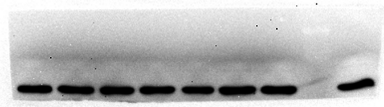

**Figure 13 b. the original blot of t-P65 (another exposure image).**

**GAPDH (for p-ERK/t-ERK, p-JNK/t-JNK, p-P38/t-P38, p-I $\kappa$ B $\alpha$ /t-I $\kappa$ B $\alpha$  and p-P65/t-P65 proteins):**

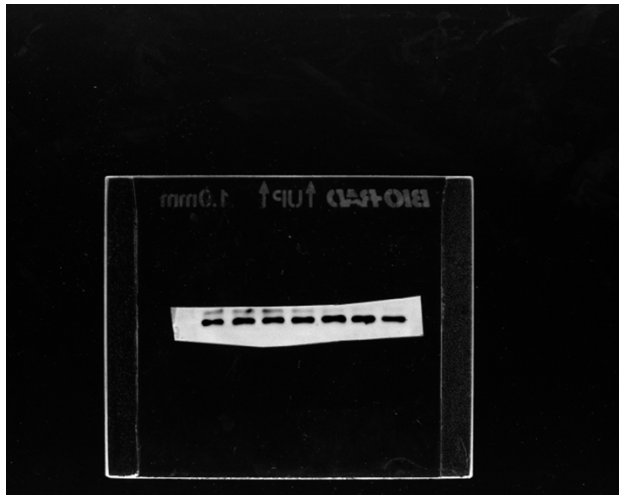

**Figure 14. the original blot of GAPDH (for p-ERK/t-ERK, p-JNK/t-JNK, p-P38/t-P38, p-I $\kappa$ B $\alpha$ /t-I $\kappa$ B $\alpha$  and p-P65/t-P65 proteins).**
